# Supplementary material for: Aromatic vs. Aliphatic Hyperbranched Polyphosphoesters as Flame Retardants in Epoxy Resins
Source: PubMed Central journal article supplement (PMC6864611; doi:10.3390/molecules24213901), 2019-10-29
Supplement: molecules-24-03901-s001.pdf [file molecules-24-03901-s001.pdf]

## Supporting Information

for

### **Aromatic vs. aliphatic hyperbranched polyphosphoesters as flame retardants in epoxy resins**

*Jens C. Markwart<sup>‡[1,2]</sup>, Alexander Battig<sup>‡[3]</sup>, , Maria M. Velencoso<sup>[1]</sup>, Dennis Pollok<sup>[1]</sup>, Bernhard Schartel<sup>\*[3]</sup>, Frederik R. Wurm<sup>\*[1]</sup>*

<sup>1</sup> Max-Planck-Institut für Polymerforschung, Ackermannweg 10, 55128 Mainz, Germany; wurm@mpip-mainz.mpg.de

<sup>2</sup> Bundesanstalt für Materialforschung und -prüfung (BAM), Unter den Eichen 87, 12205 Berlin, Germany; bernhard.schartel@bam.de

<sup>3</sup> Graduate School Materials Science in Mainz, Staudinger Weg 9, 55128 Mainz, Germany

<sup>‡</sup> These authors contributed equally to this work.

#### **Corresponding author:**

\*E-mail: wurm@mpip-mainz.mpg.de; bernhard.schartel@bam.de

**Table S1.** Polymerization conditions of **1** with Grubbs Hoveyda 2<sup>nd</sup> in 1-chloronaphthalene generation catalyst at 40 °C in solution.

| 1 <sup>st</sup> addition                                              |               |            |            |            |       |
|-----------------------------------------------------------------------|---------------|------------|------------|------------|-------|
| Polymer                                                               | %mol Catalyst | Time (min) | Mn (g/mol) | Mw (g/mol) | D     |
| 1.2                                                                   | 0.32          | 60         | 1300       | 1400       | 1.1   |
| 1.3 <sup>i</sup>                                                      | 0.65          | 60         | 1700       | 2400       | 1.4   |
| 1.5 <sup>ii</sup>                                                     | 0.65          | 45         | -          | -          | -     |
| 1.15                                                                  | 0.81          | 120        | 3000       | 8700       | 2.9   |
| 2 <sup>nd</sup> addition (after sampling of 1 <sup>st</sup> addition) |               |            |            |            |       |
| Polymer                                                               | %mol Catalyst | Time (min) | Mn (g/mol) | Mw (g/mol) | D     |
| 1.2                                                                   | 0.32          | 60         | 1756       | 2390       | 1.36  |
| 1.3                                                                   | 0.65          | 30         | 4185       | 56306      | 13.45 |
| 1.5                                                                   | 0.32          | 25         | 4875       | 55333      | 11.35 |

<sup>i</sup> in bulk. <sup>ii</sup> cross-linked.

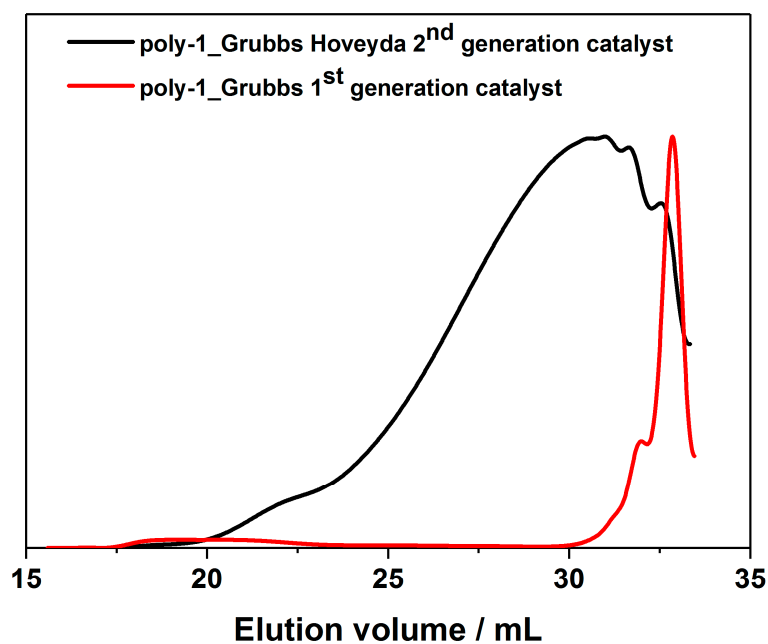

**Figure S1.** SEC curves (VWD-Signal 270 nm) of **poly-1** in DMF polymerized with Grubbs 1st generation catalyst and Grubbs Hoveyda 2nd generation catalyst at 40 °C.

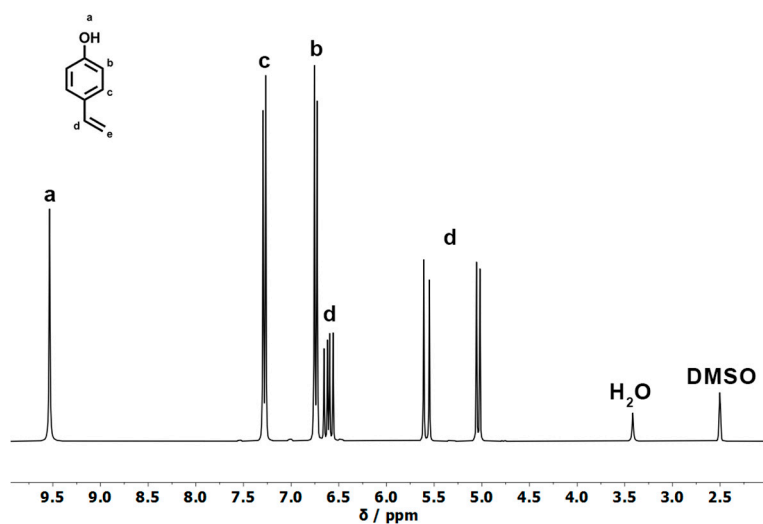

**Figure S2.**  $^1\text{H}$  NMR (300 MHz in  $\text{CDCl}_3$  at 298 K) spectra of 4-vinylphenol.

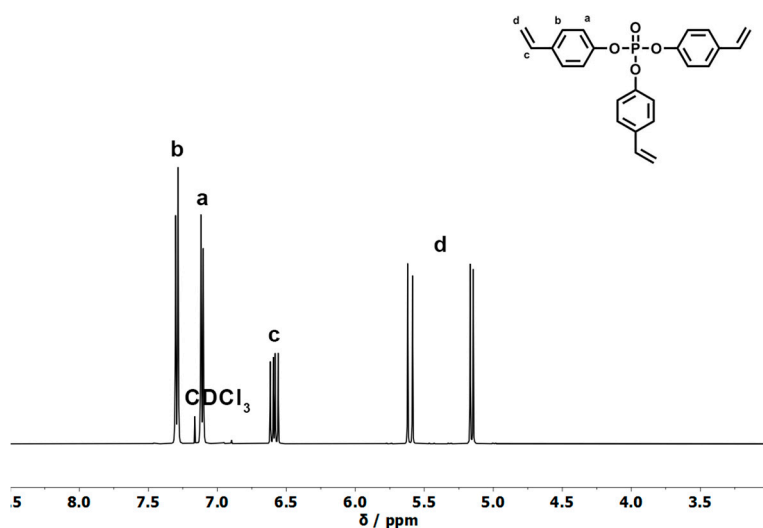

**Figure S3.**  $^1\text{H}$ -NMR (500 MHz in  $\text{CDCl}_3$  at 298 K) spectra of **1**.

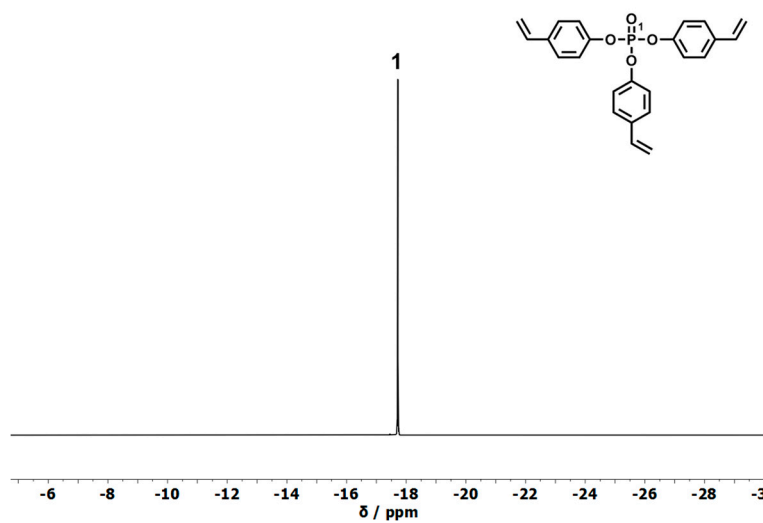

**Figure S4.**  $^{31}\text{P}$   $\{^1\text{H}\}$ -NMR (121 MHz in  $\text{CDCl}_3$  at 298 K) spectra of **1**.

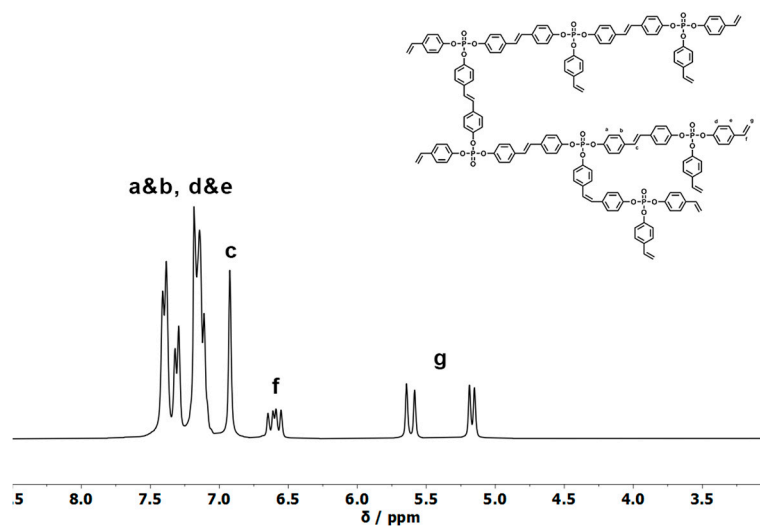

Figure S5.  $^1\text{H}$ -MR (300 MHz in  $\text{CDCl}_3$  at 298 K) spectra of **poly-1**.

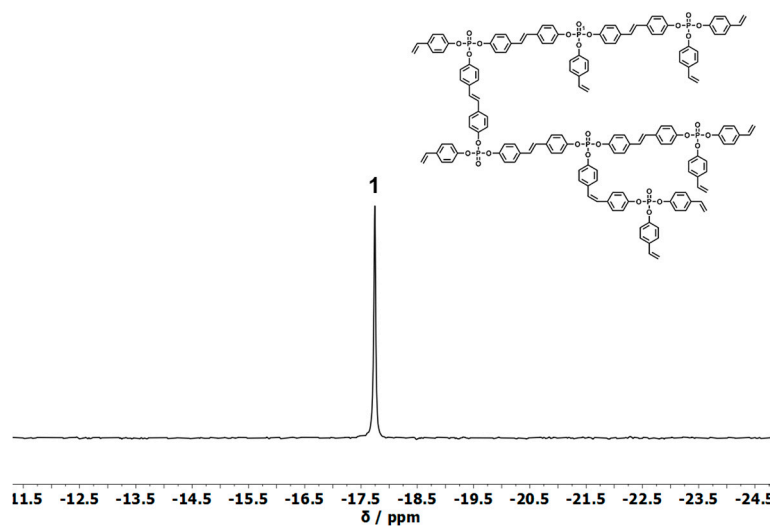

Figure S6.  $^{31}\text{P}$  {H}-NMR (121 MHz in  $\text{CDCl}_3$  at 298 K) spectra of **poly-1**.

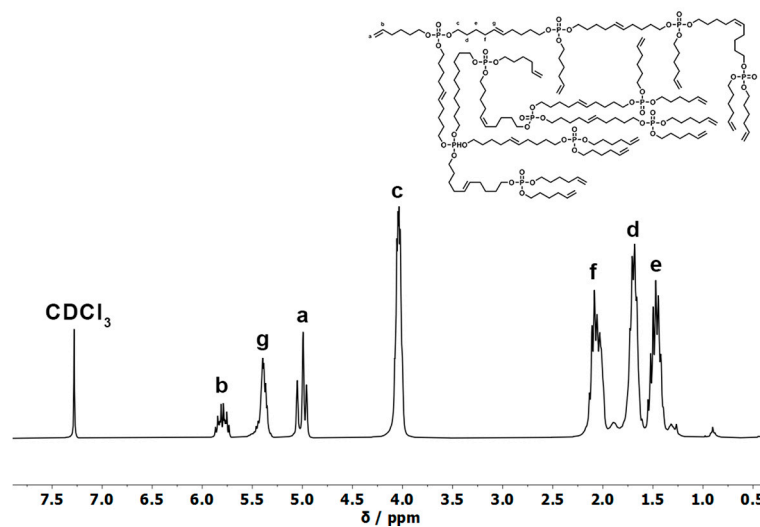

Figure S7.  $^1\text{H}$ -MR (300 MHz in  $\text{CDCl}_3$  at 298 K) spectra of **poly-2**.

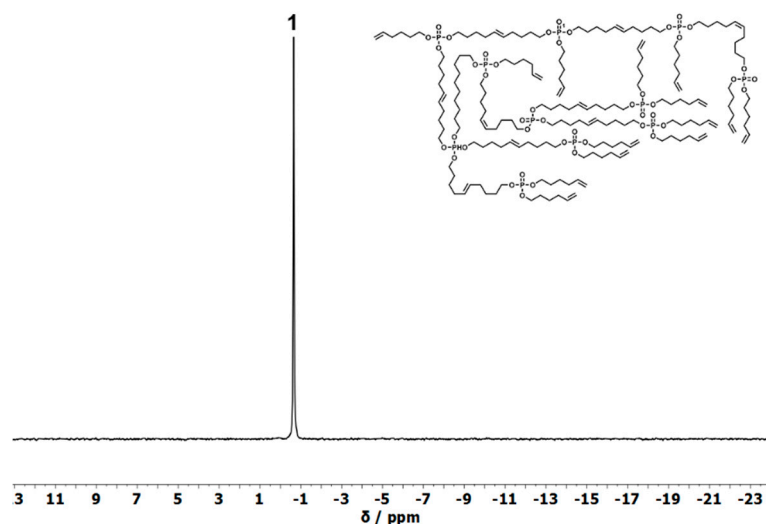

**Figure S8.**  $^{31}\text{P}$  {H}-NMR (121 MHz in  $\text{CDCl}_3$  at 298 K) spectra of **poly-2**.

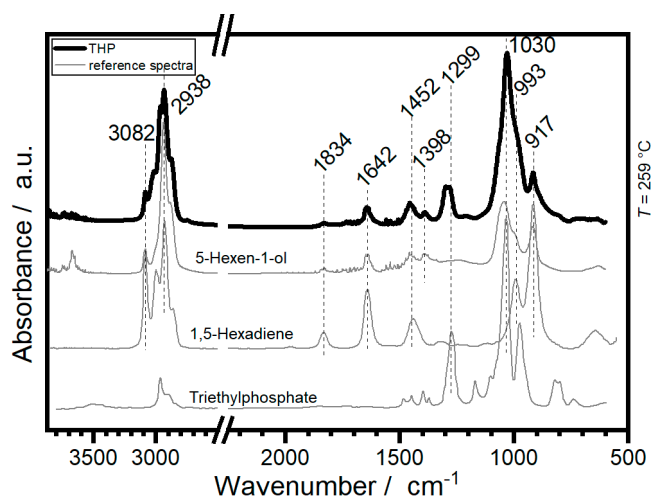

**Figure S9.** TGA-FTIR spectrum of **2** (top, black), identifying the main decomposition products (1,5-hexadiene; 5-hexen-1-ol and phosphate species, comparison shown in gray below) at specific decomposition temperature (259 °C) using references from NIST library.[1]

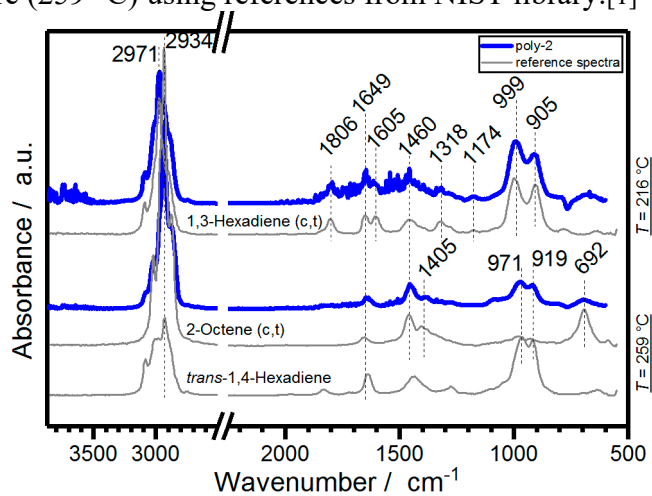

**Figure S10.** TGA-FTIR spectrum of **poly-2** (top, blue), identifying the main decomposition products (1,3-hexadiene (c,t) and 2-octene (c,t) and trans-1,4-hexadiene, comparison shown in gray below) at specific decomposition temperature (216 °C, 259 °C) using references from NIST library.[1]

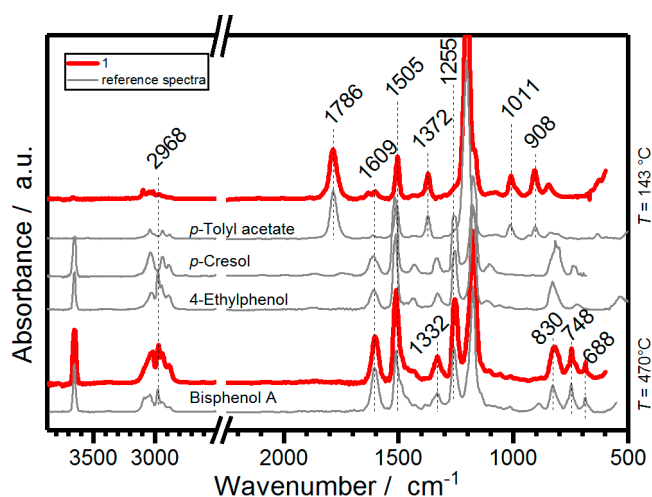

**Figure S11.** TGA-FTIR spectrum of **1** (top, red), identifying the main decomposition products (p-tolyl acetate; p-cresol; 4-ethylphenol and bisphenol A, comparison shown in gray below) at specific decomposition temperature (143 °C, 470 °C) using references from NIST library.[1]

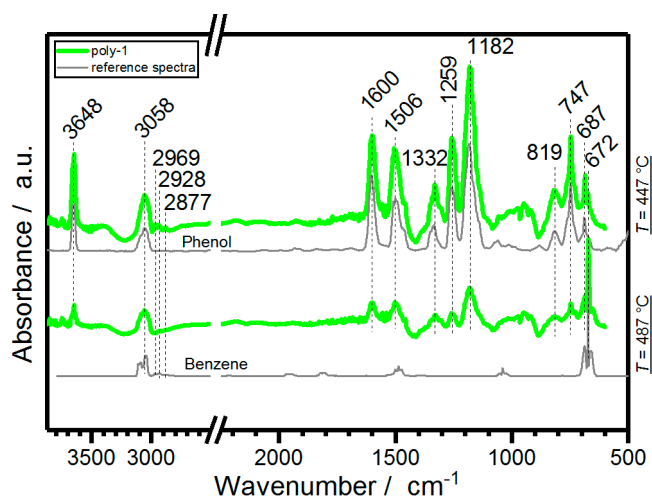

**Figure S12.** TGA-FTIR spectrum of **poly-1** (top, green), identifying the main decomposition products (phenol and benzene, comparison shown in gray below) at specific decomposition temperature (447 °C and 487 °C) using references from NIST library.[1]

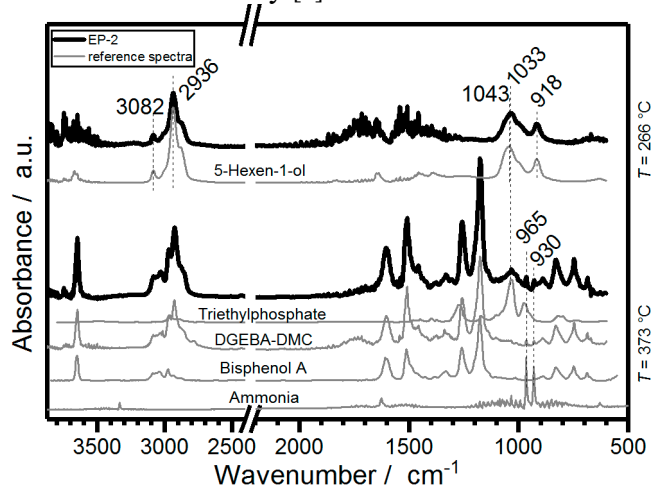

**Figure S13.** TGA-FTIR spectrum of **EP-2** (top, black), identifying the main decomposition products (5-hexen-1-ol; phosphate species and decomposition products of the matrix, a comparison is shown in gray below) at specific decomposition temperature (266 °C, 373 °C) using references from NIST library.[1]

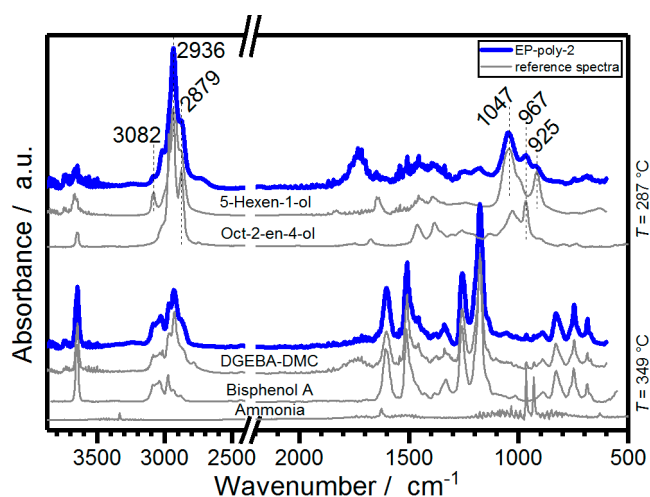

**Figure S14.** TGA-FTIR spectrum of **EP-poly-2** (top, blue), identifying the main decomposition products (5-hexen-1-ol; oct-2-en-4-ol and decomposition products of the matrix, a comparison is shown in gray below) at specific decomposition temperature (287 °C, 349 °C) using references from NIST library.[1]

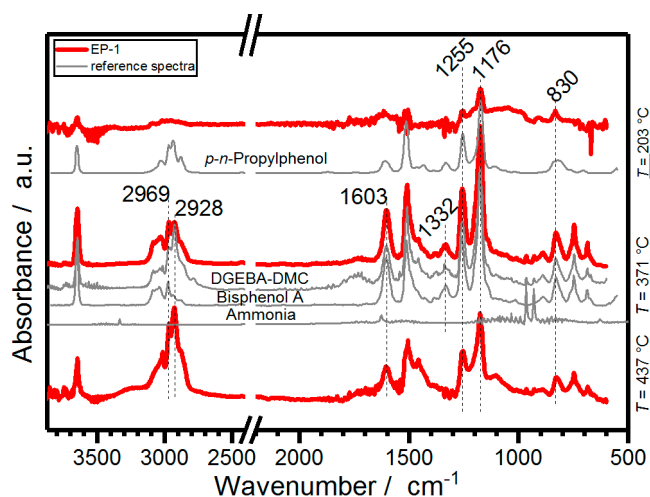

**Figure S15.** TGA-FTIR spectrum of **EP-1** (top, red), identifying the main decomposition products (p-n-propylphenol and decomposition products of the matrix, a comparison is shown in gray below) at specific decomposition temperature (203 °C, 371 °C, 437 °C) using references from NIST library.[1]

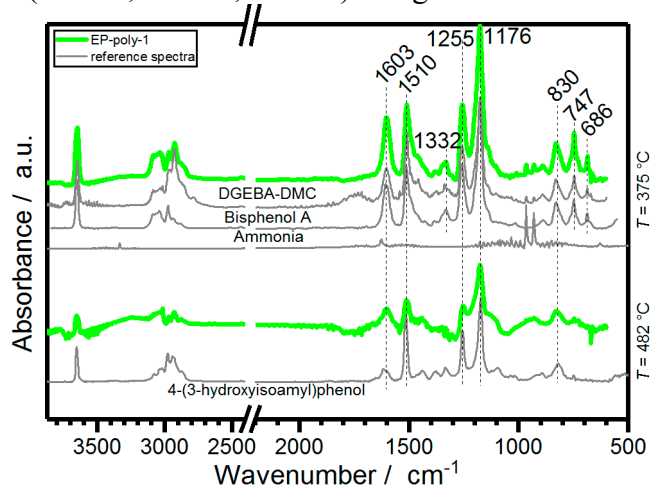

**Figure S16.** TGA-FTIR spectrum of **EP-poly-1** (top, green), identifying the main decomposition products (4-(3-hydroxyisoamyl)phenol and decomposition products of the matrix, a comparison is shown in gray below) at specific decomposition temperature (375 °C, 482 °C) using references from NIST library.[1]

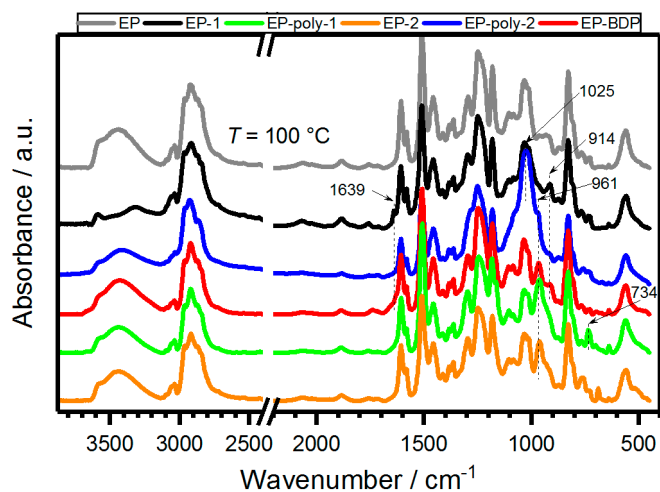

**Figure S17.** Results from hot-stage FTIR measurements, comparing the condensed phase spectra of EP-FRs at 100 °C.

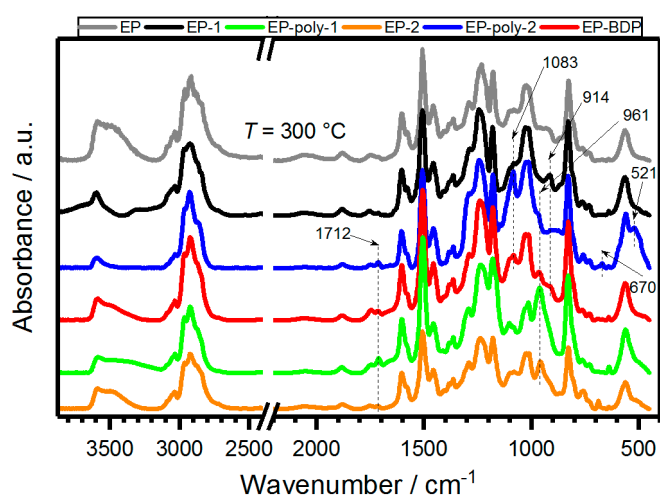

**Figure S18.** Results from hot-stage FTIR measurements, comparing the condensed phase spectra of EP-FRs at 300 °C.

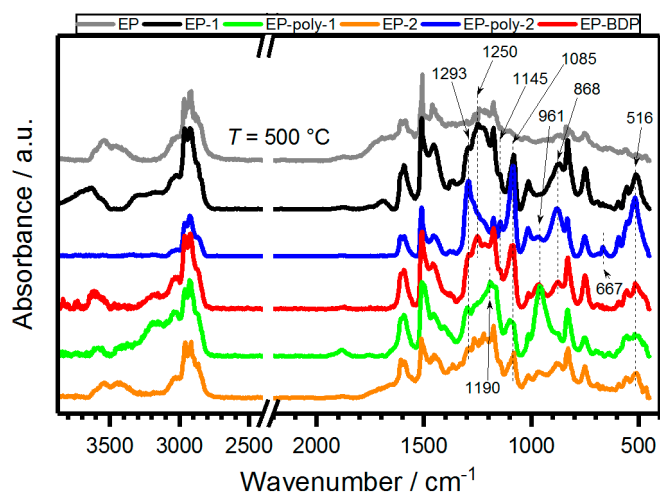

**Figure S19.** Results from hot-stage FTIR measurements, comparing the condensed phase spectra of EP-FRs at 500 °C.



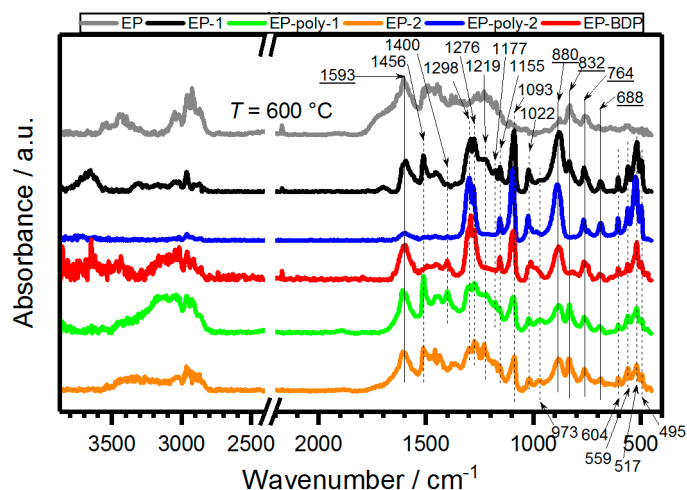

**Figure S20.** Results from hot-stage FTIR measurements, comparing the condensed phase spectra of **EP-FRs** at 600 °C, underlined bands are typical to DGEBA-DMC.

**Table S2.** Glass transition temperatures ( $T_g$ ) of the flame retardant containing epoxy resins (measured by DSC).

| Material  | $T_g$   |
|-----------|---------|
| EP-1      | 149 ± 1 |
| EP-poly-2 | 127 ± 3 |
| EP- 2     | 113 ± 1 |
| EP-poly-2 | 154 ± 2 |

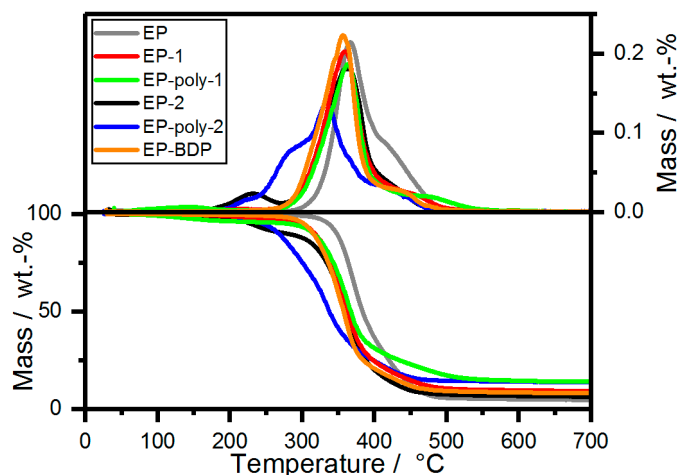

**Figure S21.** Mass loss (bottom) and mass loss rate (top) over  $T$  of neat epoxy resin and flame retardant containing epoxy resins from TGA measurements (10 K min<sup>-1</sup>; N<sub>2</sub>).

**Table S3.** TGA data of the flame retardant containing epoxy resins.  $T_{5\%}$ : Temperature at which 5% mass-loss happened;  $T_{max}$ : Temperature of maximum degradation; Residue: Residue at 700 °C.

| Material       | $T_{5\%} / ^\circ\text{C}$ | $T_{max} / ^\circ\text{C}$ | Residue / wt.-% |
|----------------|----------------------------|----------------------------|-----------------|
| DGEBA-DMC (EP) | $338 \pm 1$                | $372 \pm 1$                | $4.5 \pm 0.1$   |
| EP-1           | $279 \pm 1$                | $359 \pm 1$                | $9.1 \pm 0.2$   |
| EP-poly-1      | $299 \pm 3$                | $361 \pm 1$                | $14.7 \pm 0.5$  |
| EP-2           | $231 \pm 1$                | $367 \pm 0$                | $5.1 \pm 0.1$   |
| EP-poly-2      | $249 \pm 3$                | $337 \pm 2$                | $13.3 \pm 0.2$  |
| EP-BDP         | $304 \pm 1$                | $357 \pm 0$                | $8.2 \pm 0.1$   |

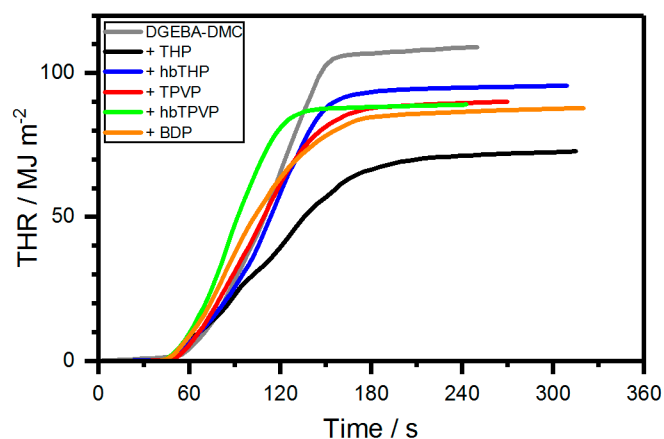

**Figure S22.** Total heat released (THR) of epoxy resin and epoxy resin with flame retardant measured by cone calorimeter.

**Table S4.** Results from cone calorimeter measurements of the flame retardant containing epoxy resins.

| Material       | THE / $\text{MJ m}^{-2}$ | PHRR / $\text{kW m}^{-2}$ | Residue / wt.-% | EHC / $\text{MJ kg}^{-1}$ | FIGRA / $\text{kW m}^{-2} \text{s}$ |
|----------------|--------------------------|---------------------------|-----------------|---------------------------|-------------------------------------|
| DGEBA-DMC (EP) | $108 \pm 3$              | $1696 \pm 180$            | $0.7 \pm 0.1$   | $26.9 \pm 1.0$            | $15.5 \pm 2.3$                      |
| EP-1           | $88 \pm 1$               | $1194 \pm 100$            | $5.3 \pm 0.0$   | $23.3 \pm 0.2$            | $11.2 \pm 0.0$                      |
| EP-poly-1      | $92 \pm 4$               | $1969 \pm 353$            | $7.0 \pm 1.5$   | $25.0 \pm 1.5$            | $15.0 \pm 0.7$                      |
| EP-2           | $78 \pm 6$               | $885 \pm 16$              | $9.2 \pm 0.1$   | $21.7 \pm 1.8$            | $9.0 \pm 0.2$                       |
| EP-poly-2      | $95 \pm 0$               | $1248 \pm 32$             | $5.1 \pm 0.7$   | $24.9 \pm 0.2$            | $9.0 \pm 0.0$                       |
| EP-BDP         | $87 \pm 1$               | $1180 \pm 41$             | $3.1 \pm 0.2$   | $22.7 \pm 0.2$            | $11.0 \pm 0.7$                      |

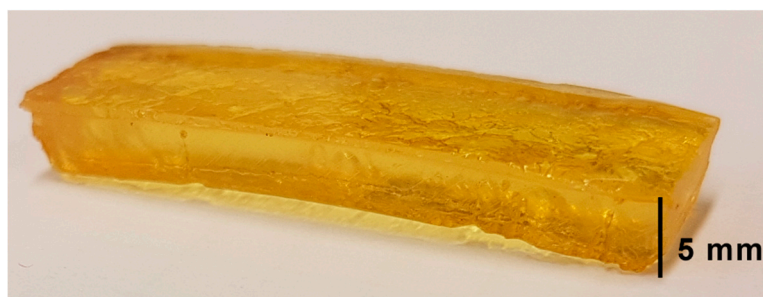

**Figure S23.** Cross-linking of **1** at 300 °C in a silicon form for 2 h, producing a hard, cross-linked PPE resin.

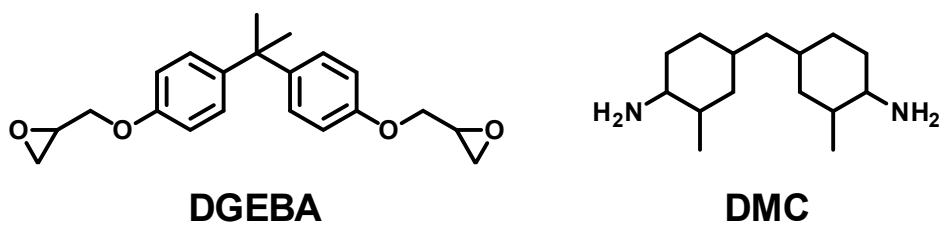

**Figure S24.** Chemical structure of Diglycidyl ether of Bisphenol A (DGEBA) and 2,2'-Dimethyl-4,4'-methylene-bis(cyclohexylamine) (DMC).

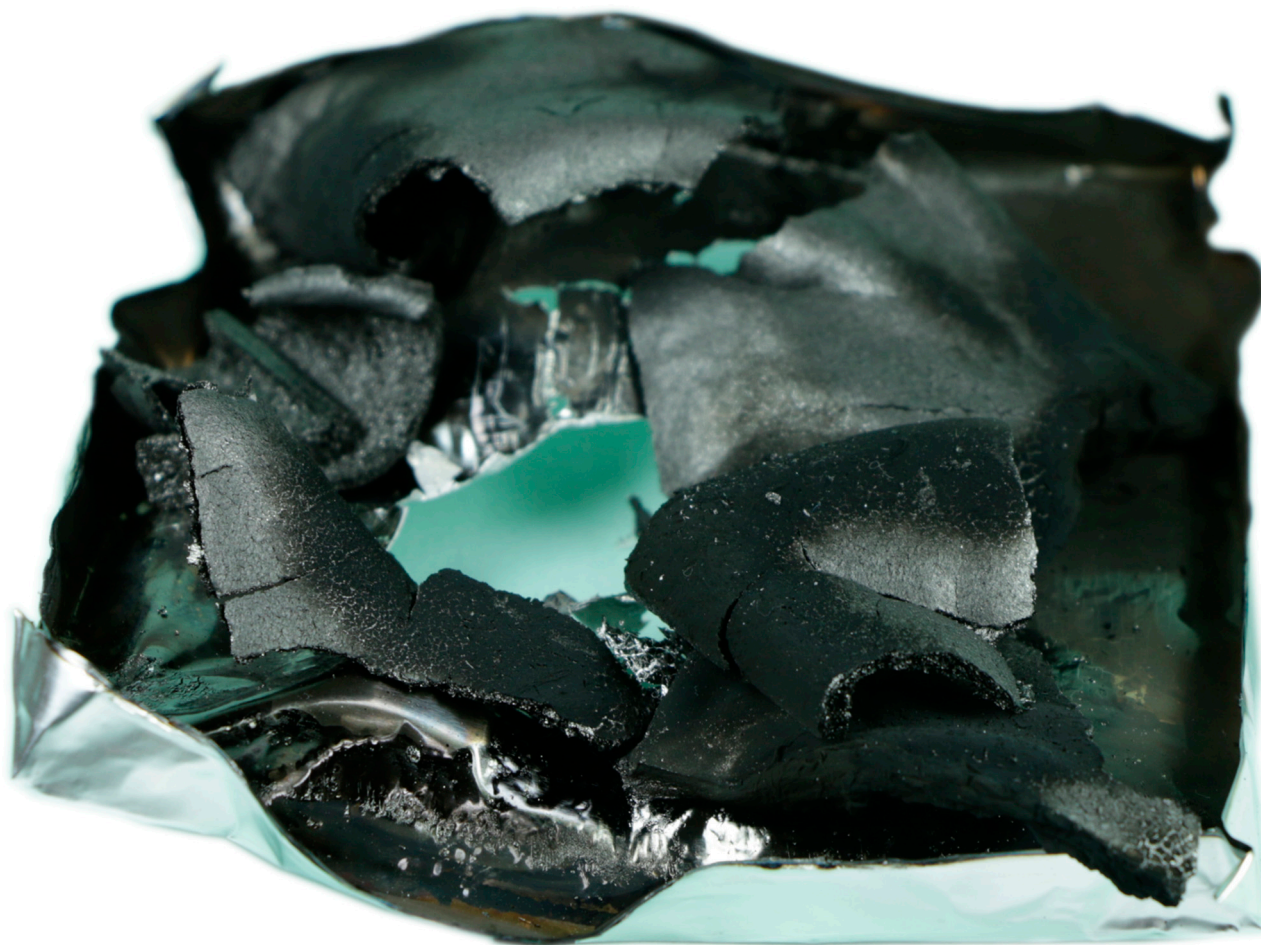

**3 cm**

**Figure S25.** Residue of EP-1 after cone calorimeter measurement, exhibiting a moderate protective layer effect from the formation of a rigid char layer.

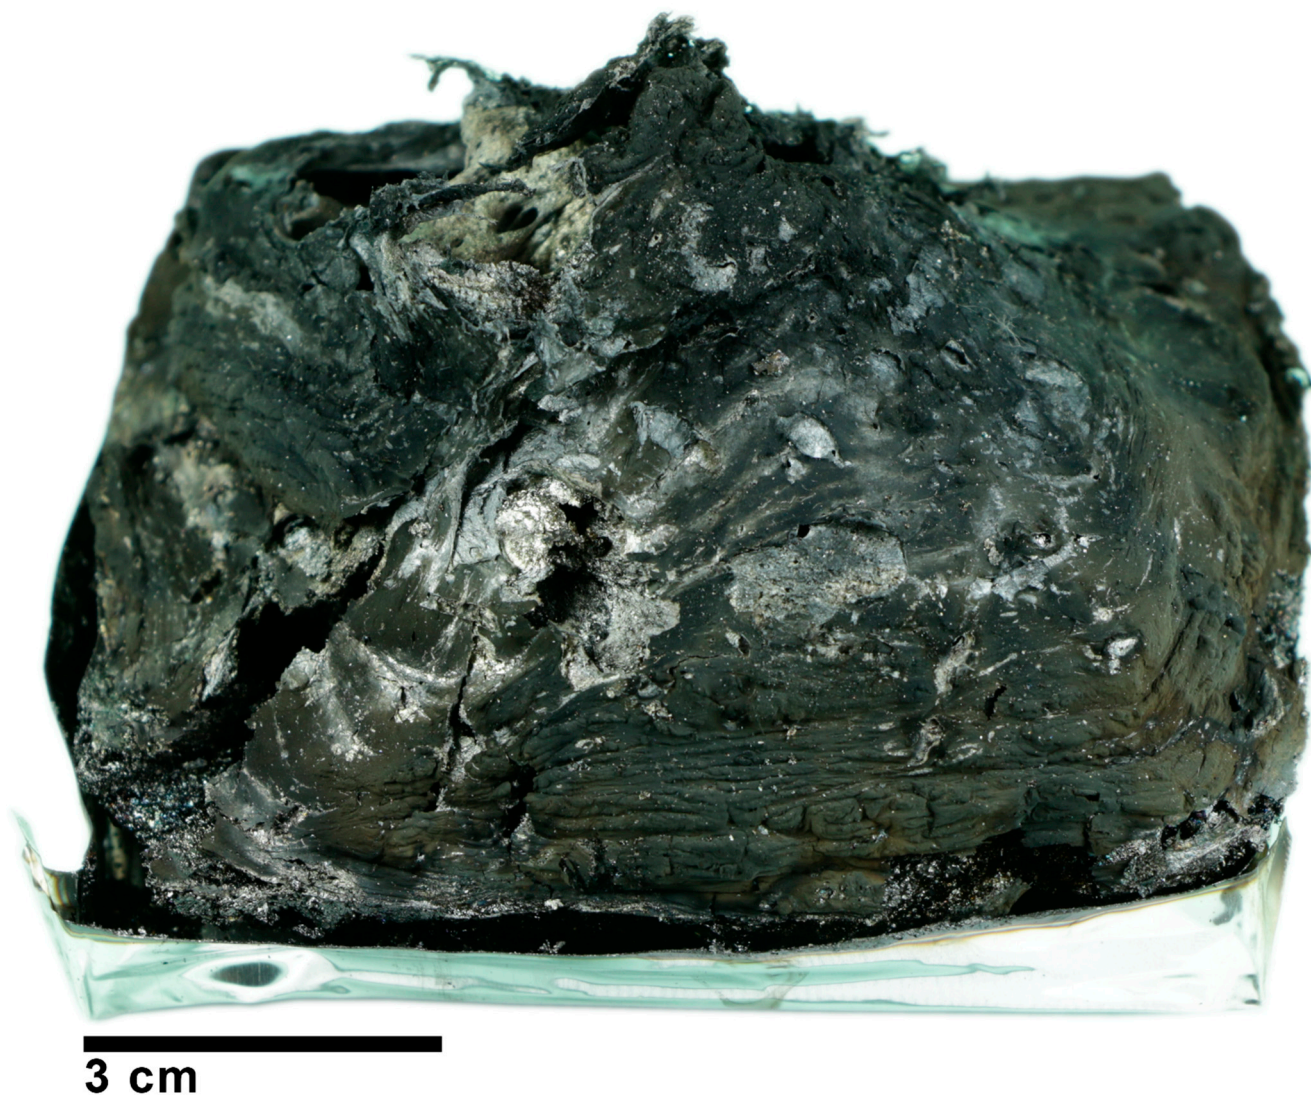

**Figure S26.** Residue of EP-2 after cone calorimeter measurements, exhibiting a strong protective layer from the large voluminous, multicellular char.

### References

1. Linstrom, P.J.; Mallard, W.G. NIST Chemistry WebBook, NIST Standard Reference Database Number 69. Available online: <https://doi.org/10.18434/T4D303> (accessed on 27.08.2019).
